# Supplementary material
Source: publisher site journal article supplement (https://www.degruyterbrill.com/publication/journal_key/PDTC/downloadAsset/PDTC_PDTC_Manuscript%20Checklist.pdf)
Supplement: Supplementary file 1 [file PDTC_PDTC_Manuscript%20Checklist.pdf]

## General format and length of manuscript types accepted for submission

Word count: title page, abstract, tables, figures, references, abbreviations, appendices & supplementary material are excluded.

### PDT&C

|                                           | Word count | Word count in abstract (max)                                                            | Number of keywords | Number of Tables & Figures | Number of references (max.) | Article                                                                             |
|-------------------------------------------|------------|-----------------------------------------------------------------------------------------|--------------------|----------------------------|-----------------------------|-------------------------------------------------------------------------------------|
| Article                                   | 8000       | 200, structured<br><i>Objectives, Methods, Results and Conclusions</i>                  | 3–6                | 8                          | 50                          | Structured into Introduction, Materials (Subjects) and methods, Results, Discussion |
| Reviews of books, websites, portals, etc. | 3500       | 200, unstructured/<br>Structured<br><i>Background, Content, Summary and Outlook</i>     | 3–6                | 4                          | 40                          | Structured or unstructured                                                          |
| Report                                    | 3500       | 200, unstructured/<br>Structured<br><i>Background, Content, Summary and Outlook</i>     | 3–6                | 2                          | 40                          | Structured or unstructured                                                          |
| News and Comments                         | 1500       | 200, unstructured/<br>Structured<br><i>Objectives, Methods, Results and Conclusions</i> | 3–6                | 2                          | 15                          | Structured or unstructured                                                          |
| Editorial                                 | 2000       | n/a                                                                                     | n/a                | 1                          | 10                          | Structured or unstructured                                                          |

### Abstract

A good abstract captures the essence of your article. It tells the reader what you studied, how, what you found, and why it matters. Ideally, it is not longer than 200 words (approx. 6-8 sentences) and structured as follows: Main Question/Background: Briefly introduce the topic and state the core problem or gap in the field your paper addresses: Make clear why the question is worth studying.

Objective(s): State the specific objective of the study or the main research question/hypothesis in one straightforward sentence.

Methods: Outline your methods: Summarize your design, data, and key methods in one concise sentence, naming only the most important elements (e.g. type of study, data source, sample size, main analytical approach).

Results: Present your main results in a nutshell: central findings, concrete outcomes and, if appropriate, one or two key numbers. Make sure to directly answer your stated question or objective.

Conclusions: State the main conclusion and its broader implication for theory, practice, or future research.

### Keywords

- Avoid very generic terms (e.g. preservation, information, education) same as too narrow concepts.
- Don't repeat words that are already in your title, but use the keywords to add complementary terms, synonyms or related concepts.
- Include terms that define what is unique about your paper, incl. at least one keyword on your methods.

### When you submit your work, please ensure the following

- You have read the Instructions for Authors.
- The manuscript is complete and uploaded correctly as Word file (or [LaTeX](#)). The HTML version and/or the PDF file generated from the submitted files must be complete and approved.
- The language in which the manuscript was written is correct and has been checked by a native speaker or a professional language service, if applicable.
- The title page information includes the full title, short title, at least one given or one middle name, and the family name in full of all authors, and the full address, affiliation and the academic title of the corresponding author. The title page should also indicate the word count, the number of tables and figures, and whether the submission includes any supplementary material.

All figures and tables have been uploaded and appear correctly at the end of the generated PDF.

Abstract, keywords, list of abbreviations, tables and figures, and captions and legends are included, depending on the manuscript type.

- Manuscript has been spell-checked and is within the word limit for the type of article.
- References are in the correct format according to the Instructions for Authors.
- References mentioned in the reference list are cited in the text and vice versa.
- Please check the data sharing policy stated in the Instructions for Authors and in the “Submit” tab on the journal website (<https://www.degruyterbrill.com/journal/key/pdtd/html>). We encourage authors to provide a data availability statement.

### **Template for Ethical and Legal Declarations**

- Strictly adhere to the instructions and wording of the template.
- The information in the Template must be identical with the information in the manuscript.
- The information in the Template will be used to prepare the proofs of your article.
